# Supplementary material for: A Trem2R47H mouse model without cryptic splicing drives age- and disease-dependent tissue damage and synaptic loss in response to plaques
Source: PubMed Central journal article supplement (PMC9938579; doi:10.1186/s13024-023-00598-4), 2023-02-17

4 month

Visual cortex

**a**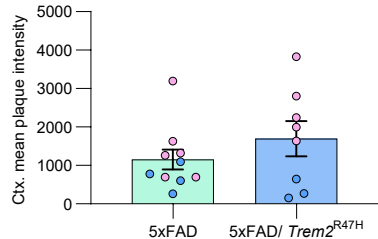**b**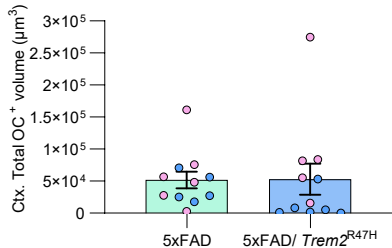

12 month

Visual cortex

**c**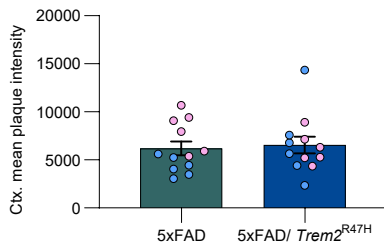**d**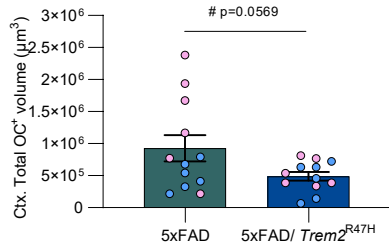

Supplement: 13024_2023_598_MOESM7_ESM.pdf [file 13024_2023_598_MOESM7_ESM.pdf]
