# Supplementary material for: A Trem2R47H mouse model without cryptic splicing drives age- and disease-dependent tissue damage and synaptic loss in response to plaques
Source: PubMed Central journal article supplement (PMC9938579; doi:10.1186/s13024-023-00598-4), 2023-02-17

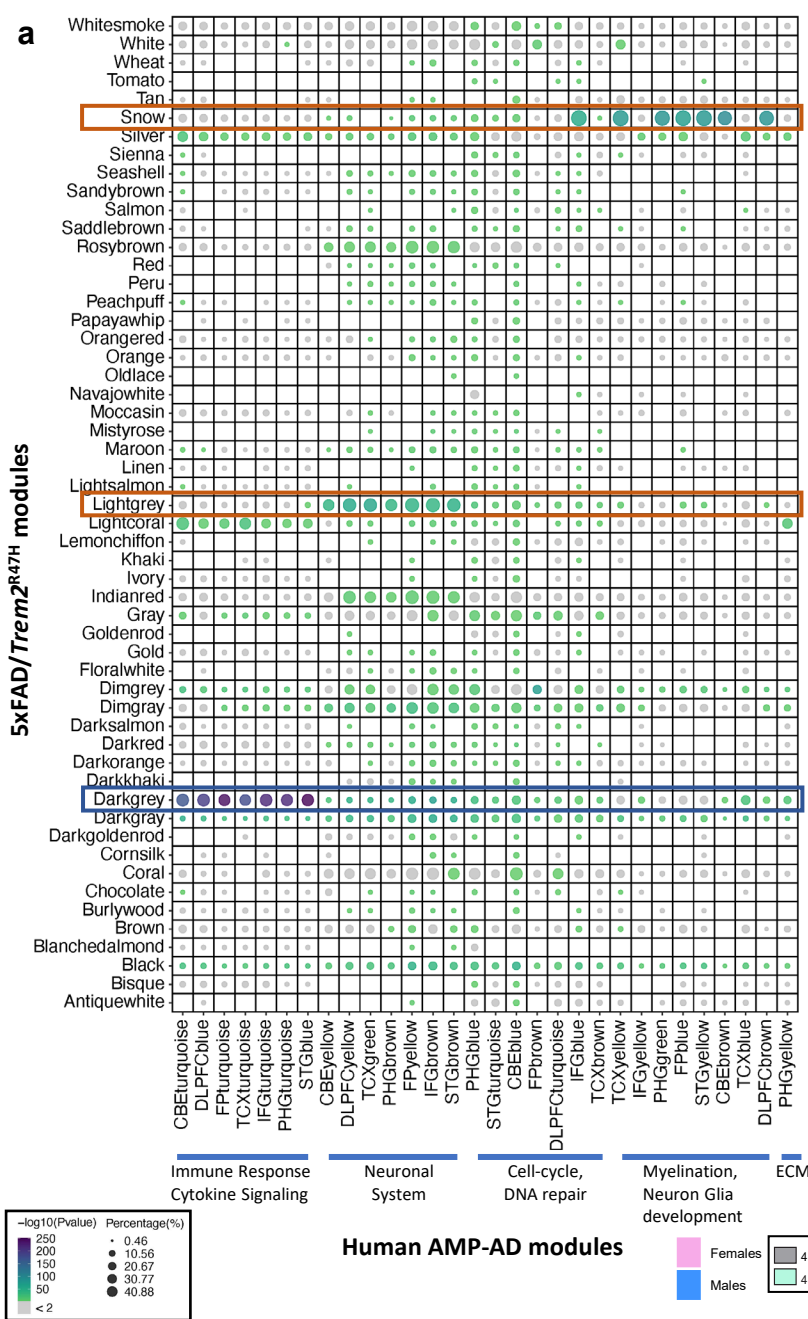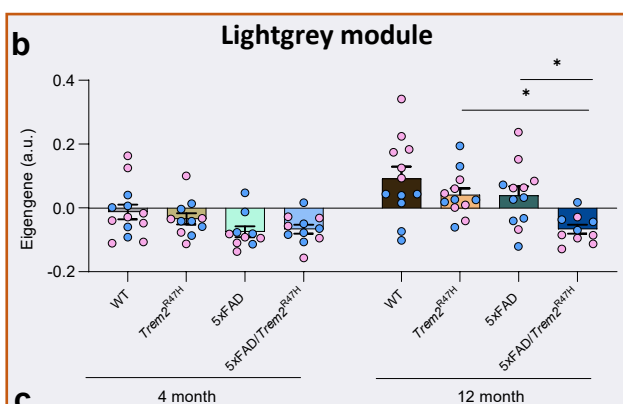

**c**

**Gene Ontology - Lightgrey**

| Gene Ontology                                                             | Adj.p.value |
|---------------------------------------------------------------------------|-------------|
| Chemical synaptic transmission                                            | 0.00186     |
| Potassium ion transmembrane transport                                     | 0.00186     |
| Potassium ion transport                                                   | 0.00186     |
| Adenylate cyclase-modulating G protein-coupled receptor signaling pathway | 0.00258     |
| Negative regulation of inflammatory response to antigenic stimulus        | 0.00364     |

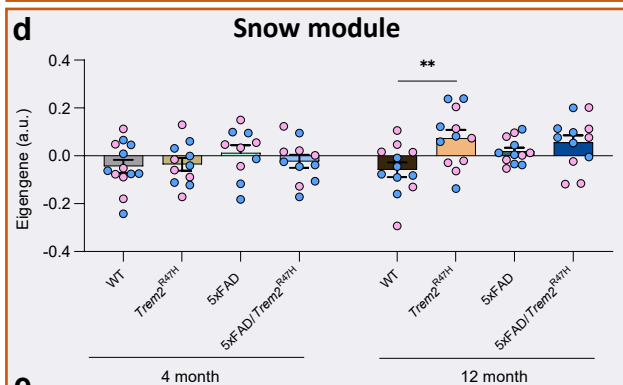

**e**

**Gene Ontology - Snow**

| Gene Ontology                               | Adj.p.value |
|---------------------------------------------|-------------|
| Myelination                                 | 4.79E-07    |
| Gliat cell differentiation                  | 0.003177    |
| Oligodendrocyte development                 | 0.003976    |
| Axon ensheathment in central nervous system | 0.006171    |
| Oligodendrocyte differentiation             | 0.006171    |

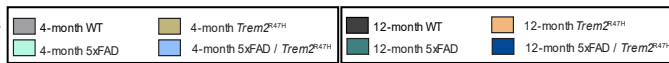

Supplement: 13024_2023_598_MOESM14_ESM.pdf [file 13024_2023_598_MOESM14_ESM.pdf]
