# Supplementary material for: A Trem2R47H mouse model without cryptic splicing drives age- and disease-dependent tissue damage and synaptic loss in response to plaques
Source: PubMed Central journal article supplement (PMC9938579; doi:10.1186/s13024-023-00598-4), 2023-02-17
Supplement: 13024_2023_598_MOESM16_ESM.pdf [file 13024_2023_598_MOESM16_ESM.pdf]

|                                |                                                                                     |                 |                          |
|--------------------------------|-------------------------------------------------------------------------------------|-----------------|--------------------------|
| <i>Hs</i>                      | TCCCTGCAGGTGTC TTGCCCTATGACTCCATGAAGCACTGGGGGAGGCGCAAGGCCTGGTGCCGCCAGCTGGGAGAGAAG   |                 |                          |
| <i>Mm</i> AA                   | -S--L--R--V--S--C--T--Y--D--A--L--K--H--W--G--R--R--K--A--W--C--R--Q--L--G--E--E-   |                 |                          |
| <i>Mm</i> wild type            | TCCTTGAGGGTGT CATGTACTTATGACGCCTTGAAGCACTGGGGGAGACCGCAAGGCCTGGTGTCGGCAGCTGGGTGAGGAG | <b>splicing</b> | <b>expression</b>        |
| Cheng-Hathaway <i>et. al</i>   | TCCTTGAGGGTGT CATGTACTTATGACGCCTTGAAGCACTGGGGGAGACACAAGGC TTGGTGTCGGCAGCTGGGTGAGGAG | cryptic         | reduced                  |
| JAX 027918 R47H <sup>CSS</sup> | TCCTTGAGGGTGT CATGTACTTATGACGCCTTGAAGCACTGGGGGAGACACAAAGC ATGGTGTCGGCAGCTGGGTGAGGAG | cryptic         | reduced                  |
| Xiang <i>et. al</i>            | TCCTTGAGGGTGT CATGTACTTATGACGCCTTGAAGCACTGGGGTCGACACAAAGCCTGGTGTCGGCAGCTGGGTGAGGAG  | cryptic         | reduced                  |
| JAX 034036 R47H <sup>NSS</sup> | TCGTTAAGGGTATCCTGCACTTATGACGC GTTGAAACAT TGGGGCAGACATAAGGCCTTGTGTCGGCAGCTGGGTGAGGAG | normal          | normal                   |
|                                |                                                                                     |                 |                          |
|                                |                                                                                     | YUVAY           | YYYYYYYYYNCAGGNN cryptic |
|                                |                                                                                     | intron          | exon                     |
