# Supplementary material for: A Trem2R47H mouse model without cryptic splicing drives age- and disease-dependent tissue damage and synaptic loss in response to plaques
Source: PubMed Central journal article supplement (PMC9938579; doi:10.1186/s13024-023-00598-4), 2023-02-17
Supplement: 13024_2023_598_MOESM17_ESM.pdf [file 13024_2023_598_MOESM17_ESM.pdf]

**Supplemental Table 1: Primers for PCR amplification and sequencing for off-target analysis.**

| Off-target code | Primer Name | Primer Sequence (5' - 3')  | Product size | Chromosome 17 locus                                         |
|-----------------|-------------|----------------------------|--------------|-------------------------------------------------------------|
| <b>a</b>        | A For       | ACCCACACTGGAGAGATACTG      | 382 bp       | <i>Pacrg</i> , intron 4 (175kb intron)                      |
|                 | A Rev       | CGTGGGAATGGGAACAGTAATG     |              |                                                             |
| <b>b</b>        | F For       | CCCCTTCTGCTTGCTTCATAC      | 286 bp       | Intergenic between <i>Cntnap5c</i> and <i>A330072L02Rik</i> |
|                 | F Rev       | AGCTTGTTGCCCACTTGTAG       |              |                                                             |
| <b>c</b>        | B For       | CCCTGTCTGAGCAGATGATTTAG    | 354 bp       | <i>Zfp945</i> , Exon 1                                      |
|                 | B Rev       | CCTCTGACCTGGGAGGTTT        |              |                                                             |
| <b>d</b>        | G For       | GGCAGGCTGGAAGGAAATAAG      | 704 bp       | <i>Ndufv2</i> , Intron 2 (9kb intron)                       |
|                 | G Rev       | GCAAACCAAGCCATCACTTTAC     |              |                                                             |
| <b>e</b>        | C For       | AAACACCGGCCTCAGAAAG        | 365 bp       | <i>Wiz</i> , Exon 7                                         |
|                 | C Rev       | AGCAGCACTCACTGTTGATATT     |              |                                                             |
| <b>f</b>        | H For       | ATCCACTCTGTTGAGGGAAAG      | 274 bp       | <i>Ptprm</i> , intron 15 (73kb intron)                      |
|                 | H Rev       | AGTGGCCTTAGGAGGTAGAG       |              |                                                             |
| <b>g</b>        | D For       | CAGACCCATCCTGTAGACTTG      | 1001 bp      | Intergenic between <i>Mrpl14</i> and <i>Vegfa</i>           |
|                 | D Rev       | CTCAGGGTTACATGCCACTAC      |              |                                                             |
| <b>h</b>        | I For       | GGGACCAAGGGAGTATTTATAG     | 473 bp       | Intergenic between <i>Lrrc30</i> and <i>Lama1</i>           |
|                 | I Rev       | TCTCCTTTCTCCAATCTCTCCTC    |              |                                                             |
| <b>i</b>        | E For       | CCTTTCTGGTGCTTCTCTTC       | 485 bp       | <i>Tfeb</i> , intron 1 (45kb intron)                        |
|                 | E Rev       | ACTCAAGCTGAAGGCCAAAG       |              |                                                             |
| <b>J</b>        | J For       | GGGACCAAGGGAGTATTTATAG     | 502 bp       | <i>Clip4</i> , intron 1 (20kb intron)                       |
|                 | J Rev       | GTGCCAGAGATGGTTCTACAG      |              |                                                             |
| <b>K</b>        | K For       | ACTCCCTAAGAAAGAAGAACAGTAAG | 549 bp       | <i>Prkce</i> , intron 1 (180kb intron)                      |
|                 | K Rev       | GTTCTCAAGAGACACAAGGAG      |              |                                                             |
