# Supplementary material for: A Trem2R47H mouse model without cryptic splicing drives age- and disease-dependent tissue damage and synaptic loss in response to plaques
Source: PubMed Central journal article supplement (PMC9938579; doi:10.1186/s13024-023-00598-4), 2023-02-17
Supplement: 13024_2023_598_MOESM18_ESM.pdf [file 13024_2023_598_MOESM18_ESM.pdf]

**Supplemental Table 2: Location of potential off-target sites for crRNA TMF1342 on mouse chromosome 17**

| Genomic DNA (11 base seed) | Position   | Strand | Mis-matches | Nearest gene                                                       | Off-target code | NSS vs WT p value |
|----------------------------|------------|--------|-------------|--------------------------------------------------------------------|-----------------|-------------------|
| acAGCcCTGGGGGAGAgGCA AGG   | 10,545,906 | +      | 4           | <i>Pacrq</i> , non-conserved region within intron 4 (175kb intron) | a               | 0.264             |
| GAAGCAgTGtGGGAcACTCA GGG   | 58,666,935 | -      | 4           | Intergenic between <i>Cntnap5c</i> and <i>A330072L02Rik</i>        | b               | 0.46              |
| GAAGaACTcaGGGAGcCGCA CGG   | 22,867,101 | -      | 4           | <i>Zfp945</i> , Exon 1                                             | c               | 0.743             |
| GAAGaACTGGGatAGAaGCA GGG   | 66,097,472 | -      | 4           | <i>Ndufv2</i> , Intron 2 (9kb intron)                              | d               | 0.663             |
| GAAGtgCTGGGGGAGAAcCA GGG   | 32,356,988 | -      | 4           | <i>Wiz</i> , Exon 7                                                | e               | 0.635             |
| tAAGCACTGGcaGAGAAgCA GGG   | 66,865,733 | +      | 4           | <i>Ptprm</i> , intron 15 (73kb intron)                             | f               | 0.509             |
| GAAGCACTtGGGGAGtCaCA AGG   | 45,861,722 | -      | 3           | Intergenic between <i>Mrpl14</i> and <i>Veafa</i>                  | g               | 0.376, 0.816      |
| GAAGCAgTGtGGaAGAtGCA GGG   | 67,693,239 | -      | 4           | Intergenic between <i>Lrrc30</i> and <i>Lama1</i>                  | h               | 0.37              |
| GcAGCACgGGGGGAGACTCc GGG   | 47,764,151 | -      | 4           | <i>Tfeb</i> , intron 1 (45kb intron)                               | i               | 0.694             |
| ccAGCACTGGGGcAGACaCA GGG   | 71,776,150 | -      | 4           | <i>Clip4</i> , intron 1 (20kb intron)                              | j               | 0.712             |
| GAAaCACTtGGGGgGAgGCA GGG   | 86,300,554 | +      | 4           | <i>Prkce</i> , intron 1 (180kb intron)                             | k               | 0.486             |
| GAAGCACTGGGGGAGACGCA AGG   | 48,348,538 | +      | 0           | <i>Trem2</i> , Exon 2                                              |                 |                   |
